# Supplementary material for: TrustDS: A Policy-First, Privacy-Preserving Framework for Interoperable Marketplace Data Exchange Across Edge and Multi-Cloud Environments
Source: Research Square preprint supplement (doi:10.21203/rs.3.rs-8768420/v1), 2026-02-16
Supplement: Supplementary file 1 [file 995f7203f456608621cfcb99.docx]

TrustDS: A Policy-First, Privacy-Preserving Framework for Interoperable Marketplace Data Exchange Across Edge and Multi-Cloud Environments

1. **Tirupathi Rao Dockara**

Chief Architect, Vice President, Head Digital Architectures and Cognitive Command, at Centific, Hyderabad, India

Corresponding Author: t.dockara@centific.com; [dtrao@yahoo.com](mailto:dtrao@yahoo.com), ORCID (Tirupathi Rao Dockara): 0000-0003-1369-1982

1. **Prof**. **(Dr.) Manisha Malhotra**
   Associate Professor & Research Coordinator, Department of Computer Applications, University Institute of Computing, Chandigarh University, Gharuan, Mohali, Chandigarh, India, researchcoordinator.uic@cumail.in

# Declarations

**Funding:** This work received no external funding.

**Competing interests:** The authors declare that they have no competing interests.

**Author contributions:** Tirupathi Rao Dockara-Conceptualization, Methodology, Software, Validation, Writing-original draft, Visualization. Manisha Malhotra—Supervision, Validation, Writing-review and editing, Project administration.

**Acknowledgements:** The authors thank collaborators and anonymous reviewers who provided feedback on earlier drafts and prototype iterations.

**Data availability:** All datasets used in the empirical demonstration are publicly available from authoritative primary publishers and/or free listings in major data exchanges and marketplaces (see Appendix D of the blinded manuscript).

**Code availability:** A minimal reproducibility package (policy examples, query templates, and verification scripts) is provided as supplementary material for peer review; upon acceptance, the artifact will be archived with a persistent identifier.

**Ethics approval and consent to participate:** Not applicable. This study used publicly available, de-identified or non-participant-identifiable data and did not involve interaction with human participants.

**Consent for publication:** Not applicable.
